# Supplementary material for: Development and Evaluation of Essential Oil-Based Nanoemulgel Formulation for the Treatment of Oral Bacterial Infections
Source: MDPI journal article supplement (doi:10.3390/gels9030252), 2023-03-21
Supplement: s1 [file s1]

## Supplementary data

### 1. GCMS Analysis of Clove essential Oil

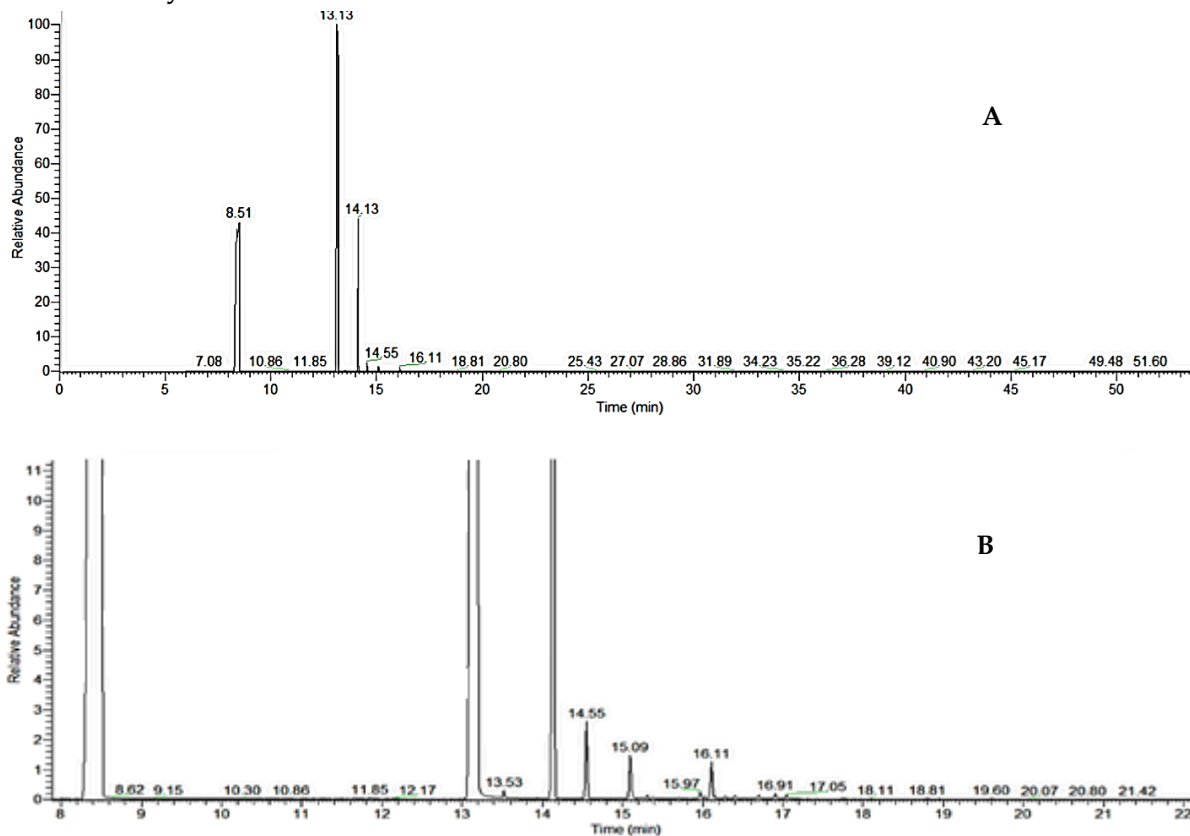

**Figure S1.** GC-MS Profile of clove essential oil (A) and zoom view of smaller peaks (B) from RT 13.53-16.91 [69].

**Table S1.** GC-MS analysis of Clove essential oil. [69]

| S.No | Compound            | Retention time | RI     | Conc % |
|------|---------------------|----------------|--------|--------|
| 1    | Benzyl alcohol      | 8.50           | 1025   | traces |
| 2    | Methyl salicylate   | 10.86          | 1021   | 0.05   |
| 3    | Limonene            | 11.66          | 1021   | traces |
| 4    | Cubebene            | 11.86          | 1022   | traces |
| 5    | Eugenol             | 13.13          | 1132   | 75     |
| 6    | Iso-eugenol         | 13.53          | 1011   | 11.08  |
| 7    | Caryophyllene       | 14.13          | 1322   | 10.2   |
| 8    | $\alpha$ -Humulene  | 14.55          | 1422   | 1.22   |
| 9    | Eugenol acetate     | 15.09          | 1357   | 12.2   |
| 10   | 2-carene            | 16.11          | traces | traces |
| 11   | $\beta$ -Humulene   | 16.28          | 1021   | 0.84   |
| 12   | Cubenol             | 16.40          | 1024   | 0.02   |
| 13   | $\alpha$ -Farnesene | 16.70          | 1254   | 0.21   |
| 14   | Caryophyllene oxide | 16.91          | 1233   | 0.34   |

**Table S2.** GCMS component analysis of Cinnamon essential oil [17].

| S.No | Compound                    | Retention time | RI   | Conc % |
|------|-----------------------------|----------------|------|--------|
| 1    | $\alpha$ -Pinene            | 5.66           | 899  | 1.3    |
| 2    | Benzaldehyde                | 6.40           | 963  | 0.3    |
| 3    | p-Cymene                    | 7.82           | 1025 | 1.9    |
| 4    | Limonene                    | 7.93           | 1075 | 1.2    |
| 5    | Eucalyptol                  | 8.08           | 1084 | 5.4    |
| 6    | c-Terpinene                 | 8.66           | 1121 | 0.4    |
| 7    | Linalool                    | 9.86           | 1188 | 7      |
| 8    | Isoborneol                  | 11.64          | 1275 | 0.8    |
| 9    | (E)-cinnamaldehyde          | 15.22          | 1414 | 71.5   |
| 10   | Eugenol                     | 16.90          | 1469 | 4.6    |
| 11   | $\beta$ -Caryophyllene      | 18.58          | 1518 | 6.4    |
| 12   | Acetic acid, cinnamyl ester | 19.23          | 1536 | 0.5    |
| 13   | $\alpha$ -Humulene          | 19.47          | 1543 | 1.7    |
| 14   | $\delta$ -Cadinene          | 20.97          | 1581 | 1.4    |
| 15   | trans-Calamenene            | 21.10          | 1585 | 0.7    |
| 16   | Caryophyllene oxide         | 22.61          | 1621 | 0.5    |
| 17   | Benzyl benzoate             | 26.82          | 1710 | 0.5    |

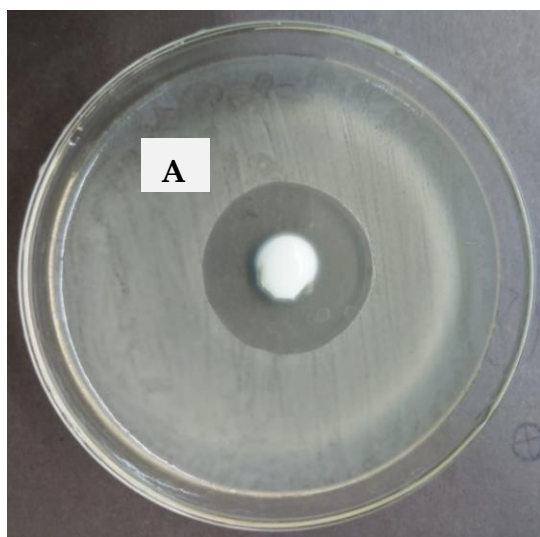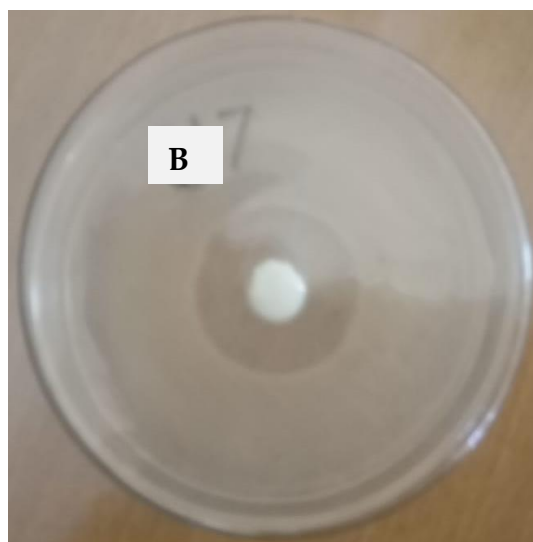

**Figure S2.** (A and B) activity of 3% essential oil loaded nanoemulgel against *S. epidermidis* and *S. aureus* respectively.

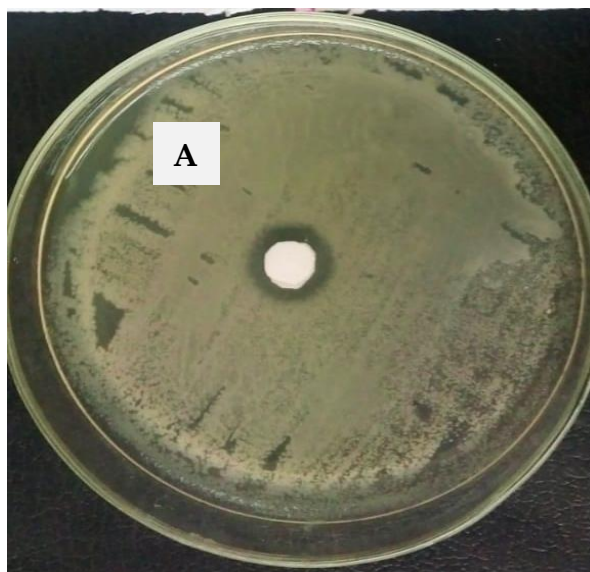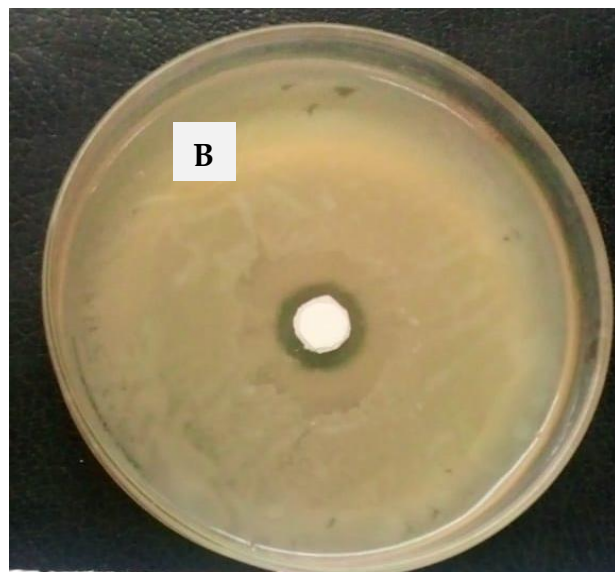

**Figure S3.** (A and B) activity of 1.5% essential oil loaded nanoemulgel against *S.epidermidis* and *S.aureus* respectively.

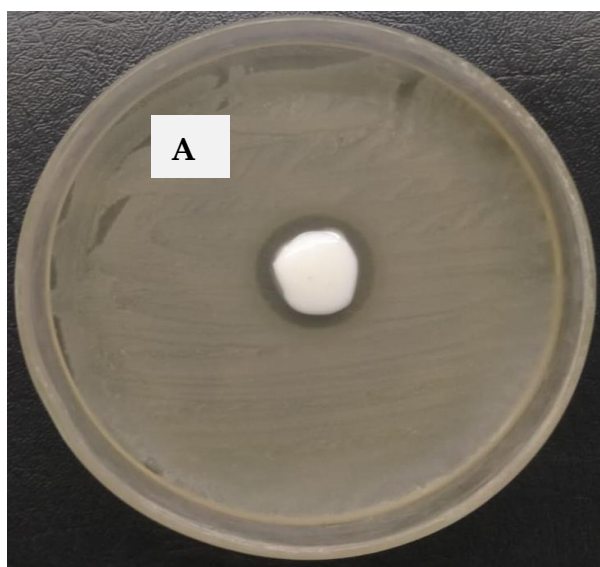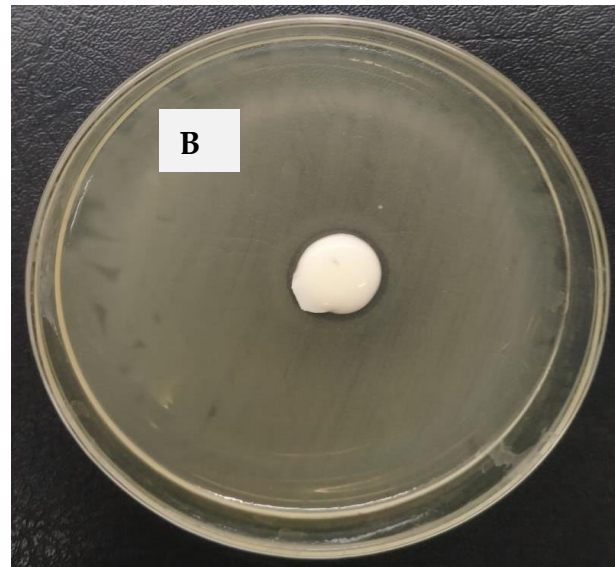

**Figure S4.** (A and B) is activity of nanoemulgel against *Pseudomonas aeruginosa* and *Bacillus chungangensis* respectively.

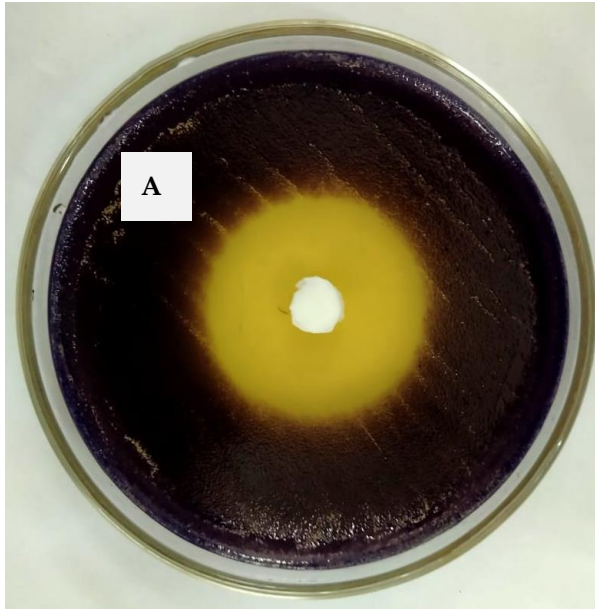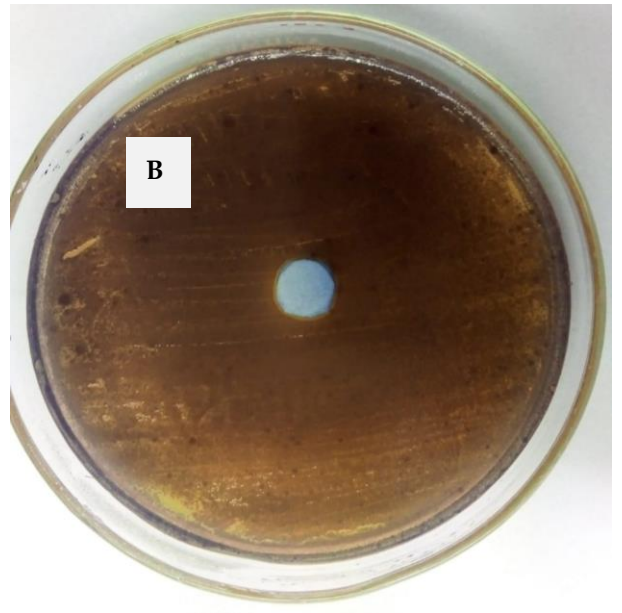

**Figure S5.** (A and B) Antiquorum sensing activity of essential oil loaded and un loaded nanoemulgel respectively against *Chromobacterium violaceum*.
